# Supplementary material for: Study of Hydroxypropyl β-Cyclodextrin and Puerarin Inclusion Complexes Encapsulated in Sodium Alginate-Grafted 2-Acrylamido-2-Methyl-1-Propane Sulfonic Acid Hydrogels for Oral Controlled Drug Delivery
Source: MDPI journal article supplement (doi:10.3390/gels9030246), 2023-03-20
Supplement: s1 [file s1]

# Supplementary Materials

## Study of Hydroxypropyl $\beta$ -Cyclodextrin and Puerarin Inclusion Complexes Encapsulated in Sodium Alginate-Grafted-2-Acrylamido -2-Methyl-1-Propane Sulfonic Acid Hydrogels for Oral Controlled Drug Delivery

**Table S1.** Effect of materials ratio on the release of puerarin from SA-g-AMPS hydrogels cross-linked with EGDMA.

| F. Codes | pH  | Zero Order               |        | First Order              |        | Higuchi Model            |        | Korsmeyer-Peppas Model |       |
|----------|-----|--------------------------|--------|--------------------------|--------|--------------------------|--------|------------------------|-------|
|          |     | $K_0$ (h <sup>-1</sup> ) | $r^2$  | $K_1$ (h <sup>-1</sup> ) | $r^2$  | $K_2$ (h <sup>-1</sup> ) | $r^2$  | $r^2$                  | n     |
| SAE-1    | 1.2 | 1.278                    | 0.9732 | 0.018                    | 0.9899 | 7.242                    | 0.9987 | 0.9991                 | 0.519 |
|          | 7.4 | 0.933                    | 0.9694 | 0.012                    | 0.9817 | 5.325                    | 0.9993 | 0.9988                 | 0.473 |
| SAE-2    | 1.2 | 1.056                    | 0.9561 | 0.014                    | 0.9747 | 0.038                    | 0.9970 | 0.9975                 | 0.457 |
|          | 7.4 | 1.049                    | 0.9640 | 0.014                    | 0.9800 | 0.009                    | 0.9994 | 0.9990                 | 0.457 |
| SAE-3    | 1.2 | 0.802                    | 0.9553 | 0.010                    | 0.9684 | 4.611                    | 0.9970 | 0.9970                 | 0.434 |
|          | 7.4 | 0.688                    | 0.9217 | 0.008                    | 0.9361 | 4.051                    | 0.9893 | 0.9974                 | 0.320 |
| SAE-4    | 1.2 | 1.218                    | 0.9712 | 0.016                    | 0.9877 | 0.907                    | 0.9976 | 0.9981                 | 0.519 |
|          | 7.4 | 0.901                    | 0.9572 | 0.011                    | 0.9706 | 5.189                    | 0.9966 | 0.9964                 | 0.424 |
| SAE-5    | 1.2 | 1.056                    | 0.9561 | 0.014                    | 0.9747 | 0.038                    | 0.9970 | 0.9975                 | 0.457 |
|          | 7.4 | 1.049                    | 0.9640 | 0.014                    | 0.9800 | 0.009                    | 0.9994 | 0.9990                 | 0.457 |
| SAE-6    | 1.2 | 1.258                    | 0.9479 | 0.017                    | 0.9741 | 7.188                    | 0.9938 | 0.9940                 | 0.488 |
|          | 7.4 | 0.774                    | 0.9516 | 0.009                    | 0.9641 | 4.466                    | 0.9968 | 0.9978                 | 0.417 |
| SAE-7    | 1.2 | 1.285                    | 0.9664 | 0.018                    | 0.9857 | 7.308                    | 0.9990 | 0.9990                 | 0.503 |
|          | 7.4 | 0.850                    | 0.9627 | 0.011                    | 0.9986 | 4.870                    | 0.9985 | 0.9981                 | 0.449 |
| SAE-8    | 1.2 | 1.056                    | 0.9561 | 0.014                    | 0.9747 | 0.038                    | 0.9970 | 0.9975                 | 0.457 |

|       |     |       |        |       |        |       |        |        |       |
|-------|-----|-------|--------|-------|--------|-------|--------|--------|-------|
| SAE-9 | 7.4 | 1.049 | 0.9640 | 0.014 | 0.9800 | 0.009 | 0.9994 | 0.9990 | 0.457 |
|       | 1.2 | 0.955 | 0.9499 | 0.012 | 0.9684 | 5.484 | 0.9963 | 0.9968 | 0.453 |
|       | 7.4 | 0.879 | 0.9565 | 0.011 | 0.9709 | 5.058 | 0.9983 | 0.9983 | 0.438 |
